# Supplementary material for: Macrofungal conservation in Canada and target species for assessment: a starting point
Source: Atypon-hosted journal article supplement (doi:10.1139/facets-2021-0180), 2022-01-01

Supplementary Figure B: Distribution of Canadian records of *Amanita* in Mycoportal (only georeferenced collections), iNaturalist (general and research grade only) and Mushroom Observer.

Distribution of the **2,683 Canadian records (georeferenced collections only) of *Amanita* on Mycoportal** ([MyCoPortal . 2022. https://www.mycportal.org/portal/index.php](https://www.mycportal.org/portal/index.php) - accessed on January 07 2022; Northern areas of Canada not included in the image have no records). Map data © 2022 Google, INEGI.

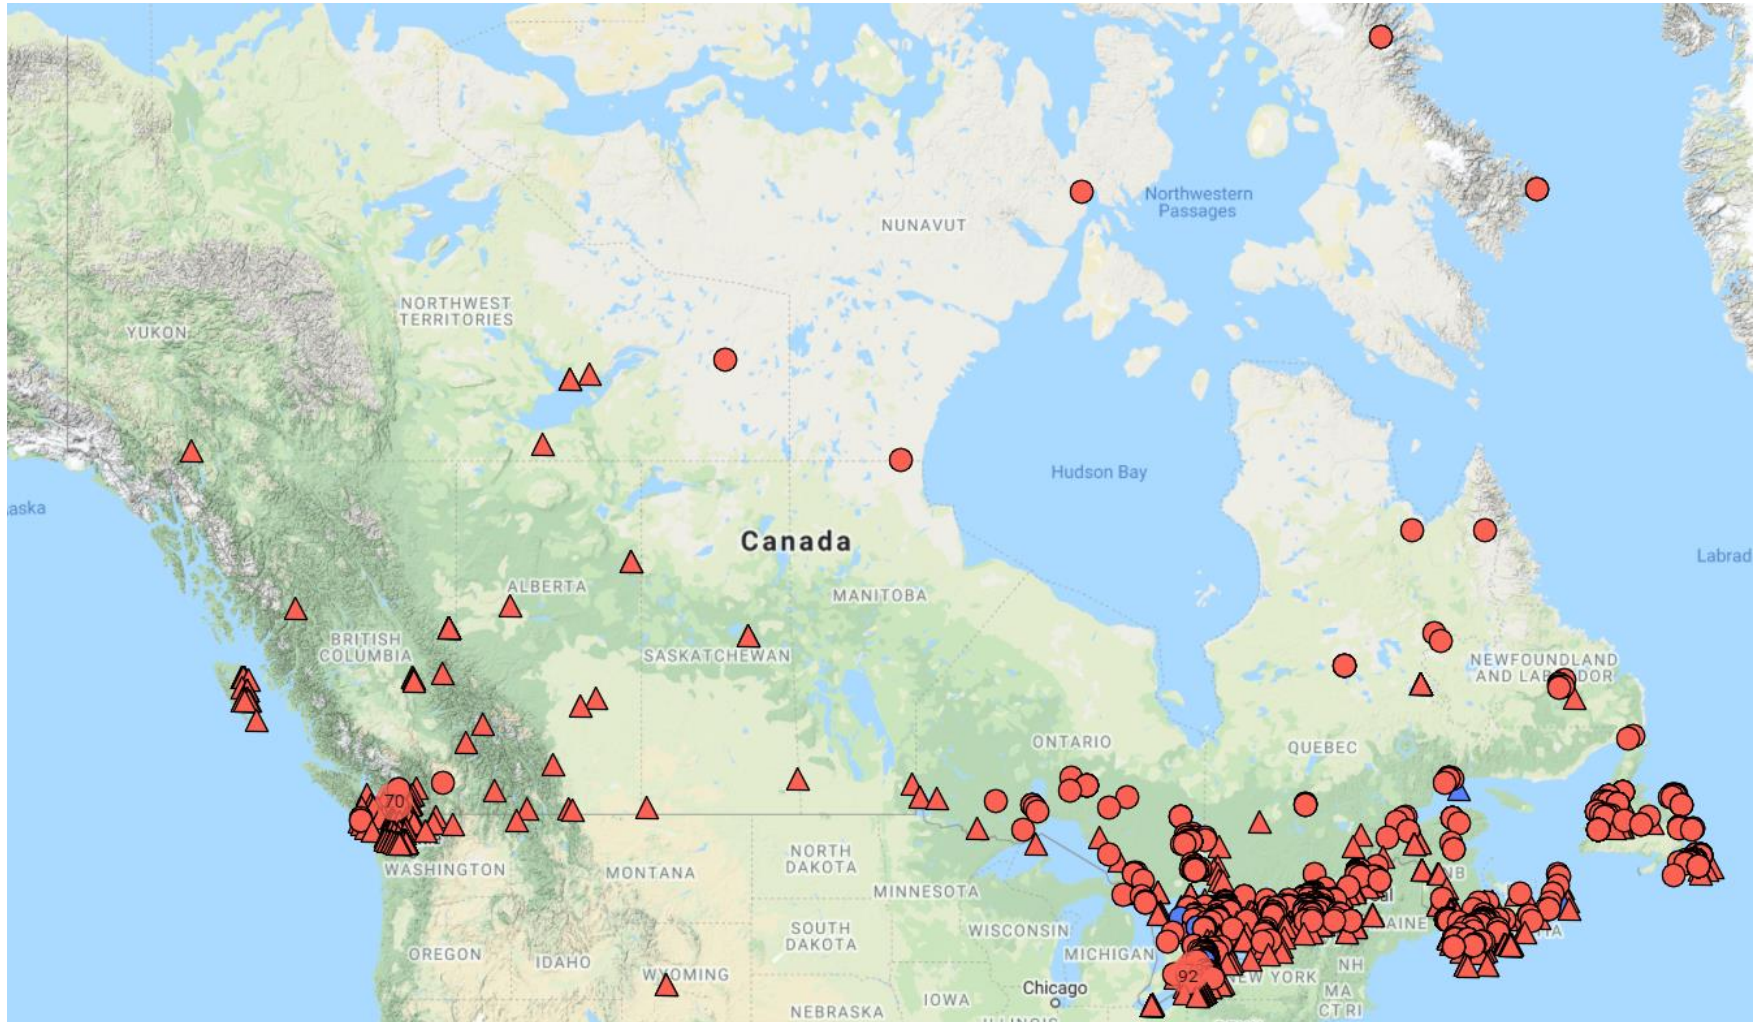

Bazzicalupo et al. Macrofungi conservation in Canada

Distribution of the **20,650 Canadian observations of *Amanita*** on iNaturalist (<https://www.inaturalist.org> - As of January 07 2022; Northern areas of Canada not included in the image have no records). Map data © 2022 Google, INEGI.

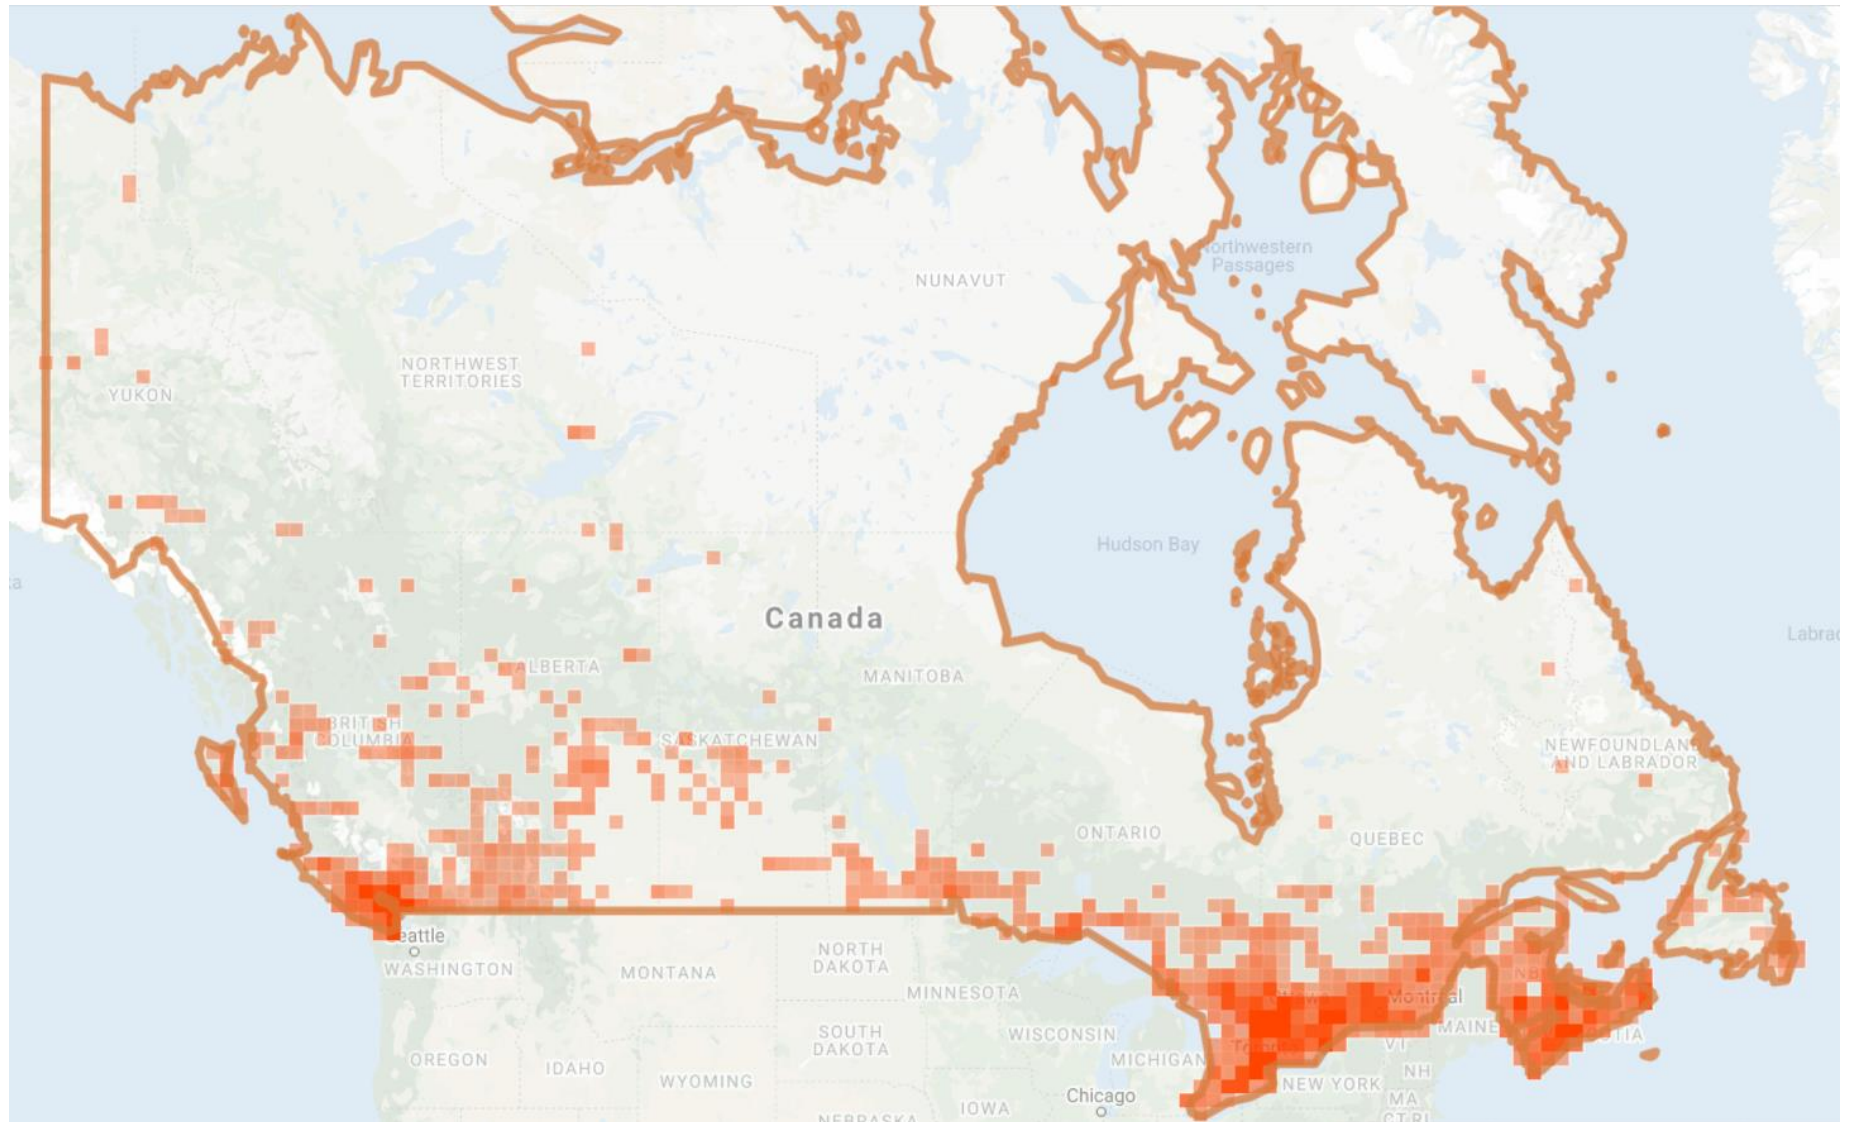

Distribution of the **5,856 Canadian observations (research grade only)** of *Amanita* on iNaturalist (<https://www.inaturalist.org> - As of January 07 2022; Northern areas of Canada not included in the image have no records). Map data © 2022 Google, INEGI.

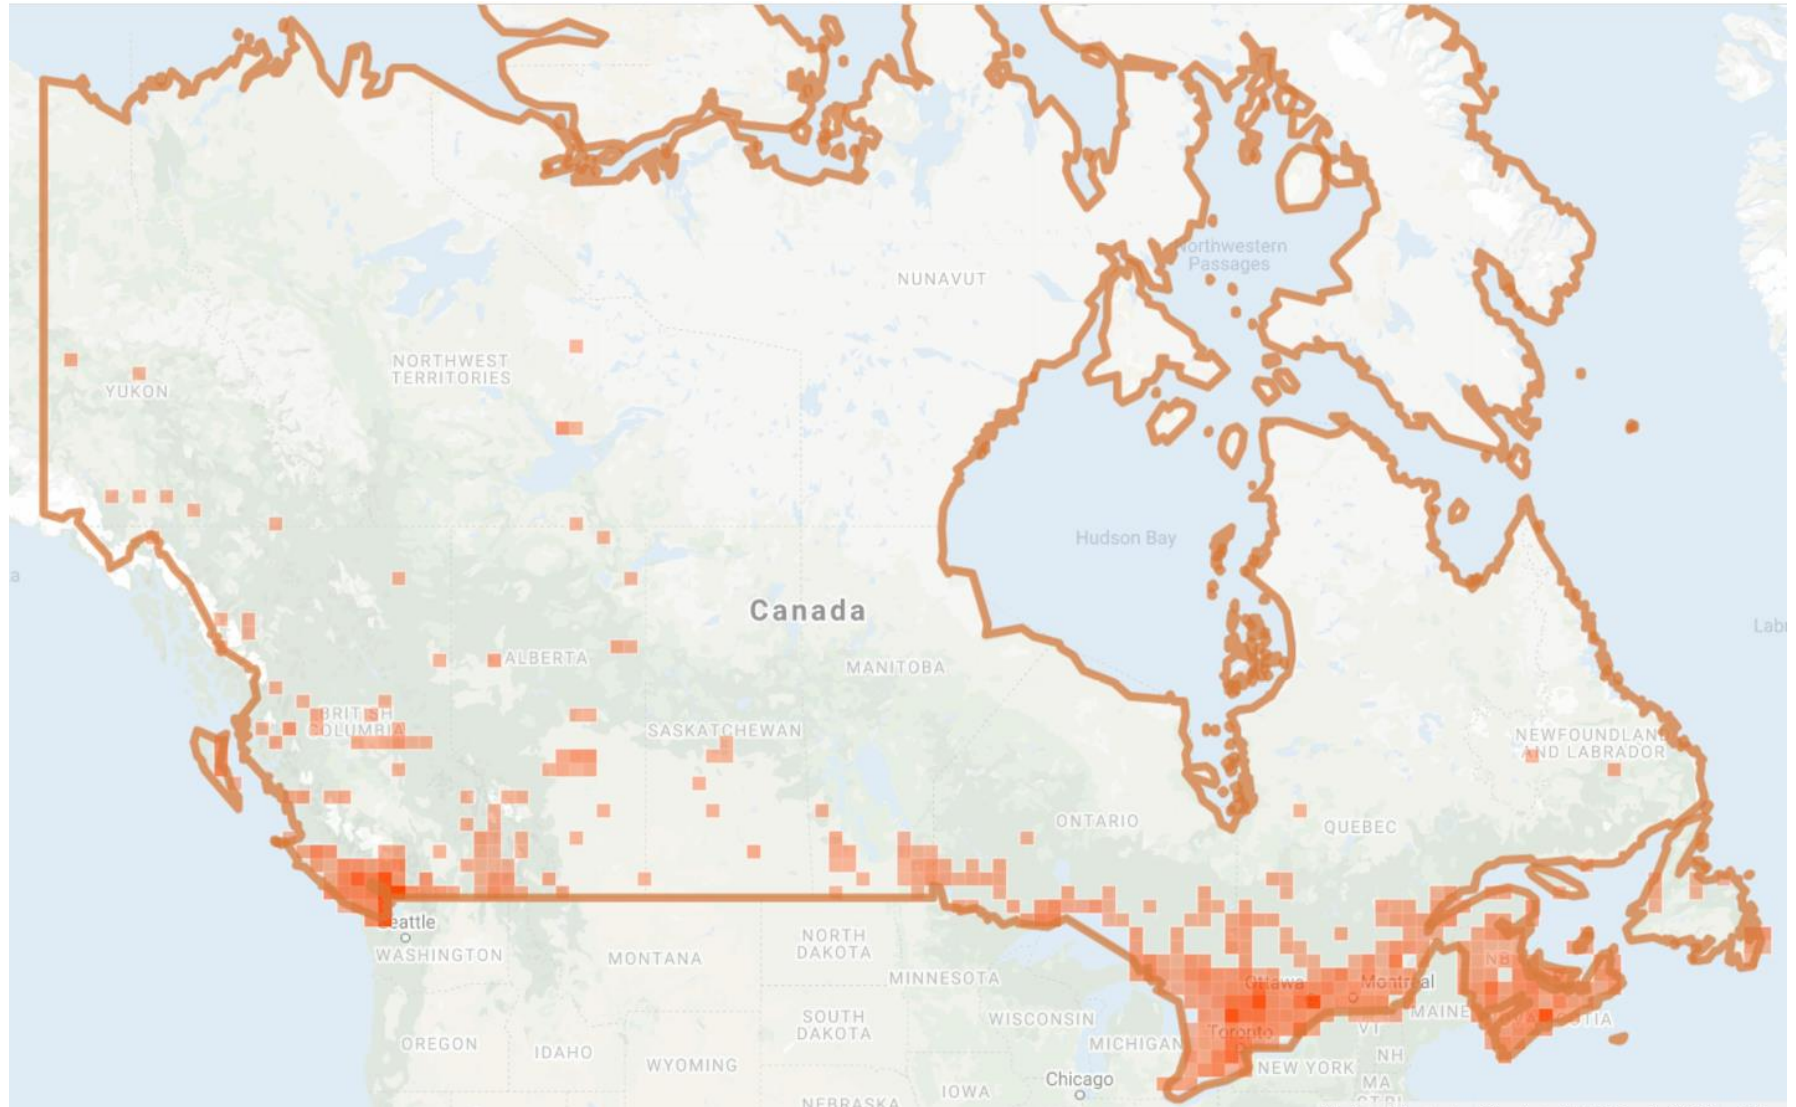

Distribution of the **2140 Canadian records of *Amanita* in Mushroom Observer** (<https://mushroomobserver.org/> - As of January 07 2022; Northern areas of Canada not included in the image have no records). Map data © 2022 Google, INEGI.

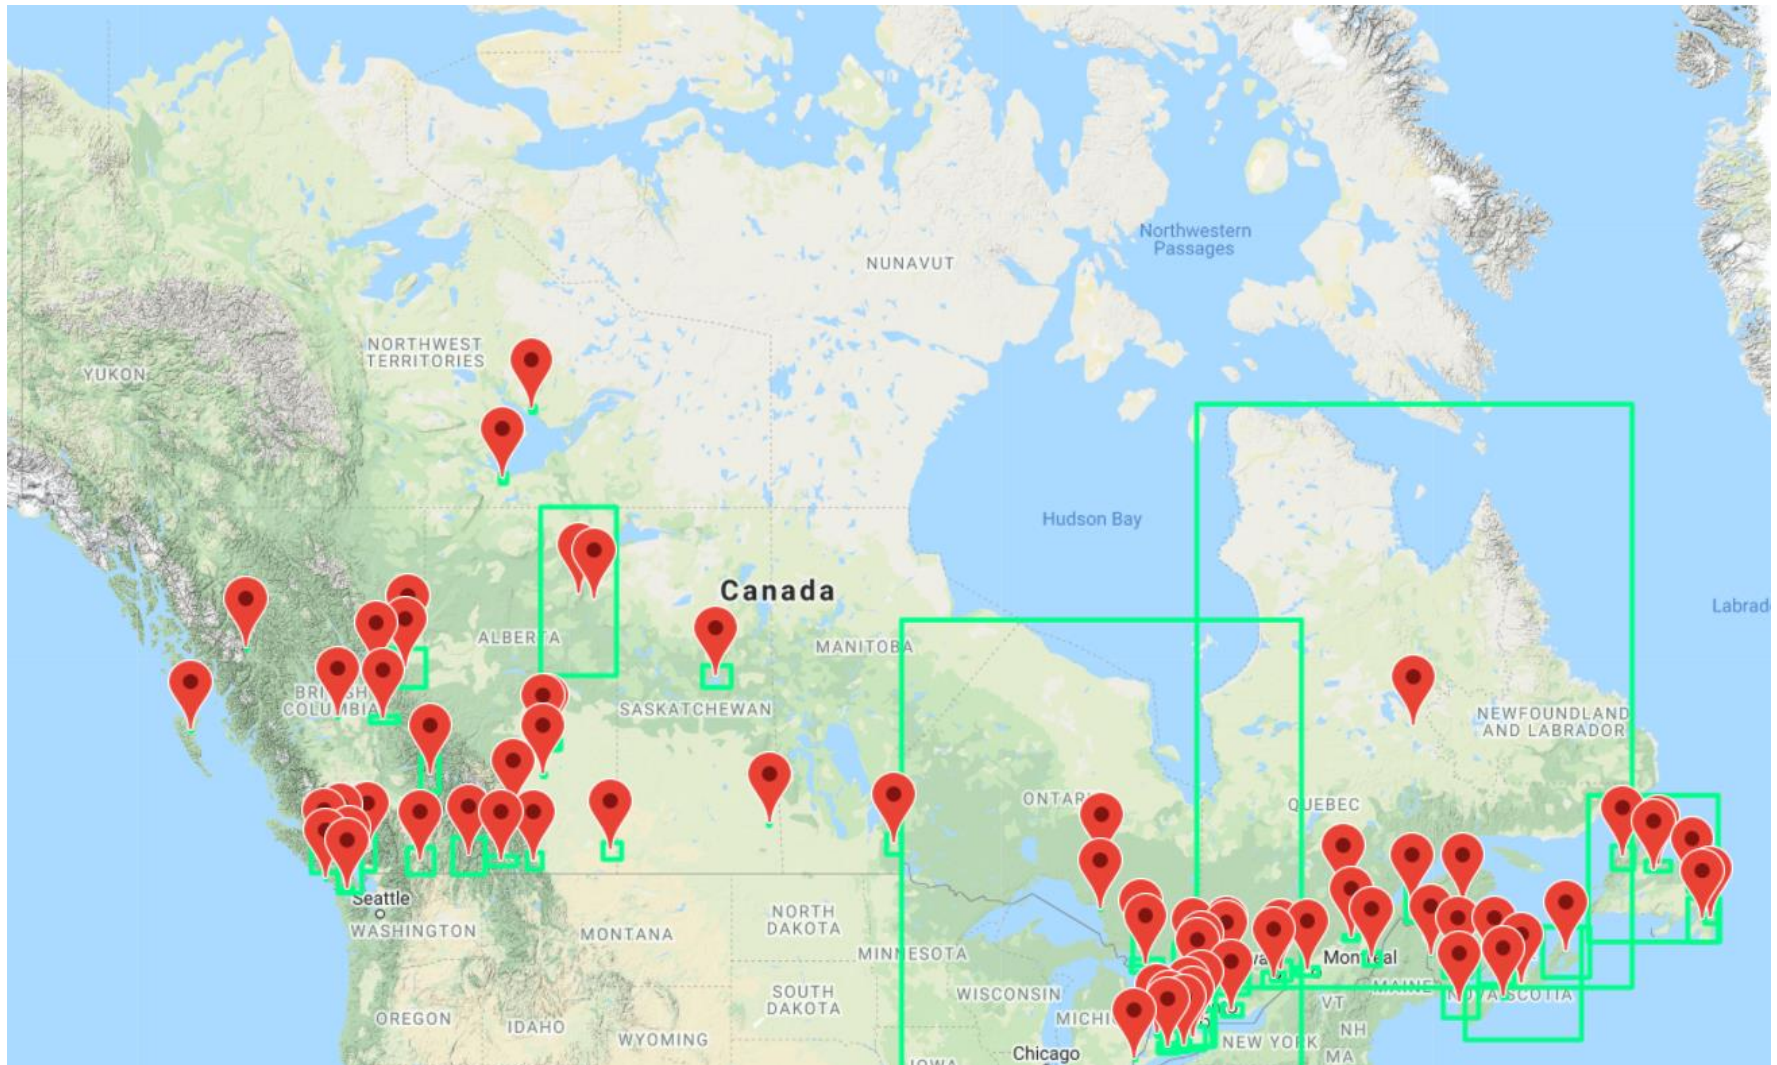

Supplement: facets-2021-0180_supplement2.pdf [file facets-2021-0180_supplement2.pdf]
